# Unique Activity Spectrum of Colicin F<sub>Y</sub>: All 110 Characterized *Yersinia enterocolitica* Isolates Were Colicin F<sub>Y</sub> Susceptible

Juraj Bosák<sup>1</sup>, Lenka Micenková<sup>1</sup>, Martin Vrba<sup>2</sup>, Alena Ševčíková<sup>2</sup>, Daniela Dědičová<sup>3</sup>, Debora Garzetti<sup>4</sup>, David Šmajš<sup>1\*</sup>

**1** Department of Biology, Faculty of Medicine, Masaryk University, Brno, Czech Republic, **2** Department of Clinical Microbiology, University Hospital Brno, Brno, Czech Republic, **3** National Reference Laboratory for *Salmonella*, The National Institute of Public Health, Prague, Czech Republic, **4** Max von Pettenkofer-Institute, Ludwig Maximilian University of Munich, Munich, Germany

## Abstract

Colicin F<sub>Y</sub> is a plasmid encoded toxin that recognizes a yersinia-specific outer membrane protein (YiuR) as a receptor molecule. We have previously shown that the activity spectrum of colicin F<sub>Y</sub> comprises strains of the genus *Yersinia*. In this study, we analyzed the activity of colicin F<sub>Y</sub> against 110 *Yersinia enterocolitica* isolates differing in geographical origin and source. All isolates were characterized through analysis of 16S rRNA genes, serotyping, biotyping, restriction profiling of genomic DNA, detection of virulence markers and susceptibility to antibiotics. This confirmed the broad variability of the collection, in which all 110 *Y. enterocolitica* isolates, representing 77 various strains, were inhibited by colicin F<sub>Y</sub>. Although isolates showed variable levels of susceptibility to colicin F<sub>Y</sub>, it was not associated with any strain characteristic. The universal susceptibility of *Y. enterocolitica* strains to colicin F<sub>Y</sub> together with the absence of activity towards strains outside the *Yersinia* genus suggests potential therapeutic applications for colicin F<sub>Y</sub>.

**Citation:** Bosák J, Micenková L, Vrba M, Ševčíková A, Dědičová D, et al. (2013) Unique Activity Spectrum of Colicin F<sub>Y</sub>: All 110 Characterized *Yersinia enterocolitica* Isolates Were Colicin F<sub>Y</sub> Susceptible. PLoS ONE 8(12): e81829. doi:10.1371/journal.pone.0081829

**Editor:** Eric Cascales, Centre National de la Recherche Scientifique, Aix-Marseille Université, France

**Received:** July 9, 2013; **Accepted:** October 17, 2013; **Published:** December 10, 2013

**Copyright:** © 2013 Bosák et al. This is an open-access article distributed under the terms of the Creative Commons Attribution License, which permits unrestricted use, distribution, and reproduction in any medium, provided the original author and source are credited.

**Funding:** This work was supported by the Ministry of Health of the Czech Republic (NT13413-4/2012) to D.S. The funders had no role in study design, data collection and analysis, decision to publish, or preparation of the manuscript.

**Competing Interests:** The authors have declared that no competing interests exist.

\* E-mail: dsmajs@med.muni.cz

## Introduction

Based on both genetic and phenotypic features, *Yersinia enterocolitica* is considered to be a heterogeneous species [1–3]. *Y. enterocolitica* is often found in aquatic environments and in various animal reservoirs, with swine being a major reservoir of human pathogenic strains. The most frequently isolated human strains belong to bioserotypes 1B/O:8, 2/O:5,27, 2/O:9, and 4/O:3, with 4/O:3 being the most common and typical for Europe [4–8].

Infections caused by *Y. enterocolitica* are the third most common bacterial alimentary infections of humans in the European Union [9]. Yersiniosis ranges from self-limited enteritis to life-threatening systemic infections. The most frequent manifestation is diarrhea, mainly affecting children [4,10–14]. Although antibiotic treatment is recommended for serious cases, the benefits of antibiotic therapy in uncomplicated cases is not well established [5,15–17]. Instead, rehydration and use of probiotics are often suggested for simple diarrheal cases.

Production of bacteriocins has been described in many genera of enteric bacteria including *Escherichia*, *Shigella*, *Citrobacter*, *Salmonella*, and *Yersinia* [18]. Although antibacterial activity of various species of genus *Yersinia* has been previously documented [19–24], only three yersinia-produced bacteriocins have been intensively studied and characterized on the molecular level. These include the bacteriocin of *Y. pestis* (pesticin I; [25–30]), a phage tail-like bacteriocin produced by *Y. enterocolitica* (enterocoliticin; [31,32]),

and a bacteriocin from *Y. frederiksenii* Y27601 (colicin F<sub>Y</sub>; [33]). Colicin F<sub>Y</sub> is produced by an environmental isolate of *Y. frederiksenii*, which contains the colicinogenic plasmid pYF27601 (5,574 bp) harboring the colicin F<sub>Y</sub> activity (*cfyA*) and immunity (*cfyI*) gene. Colicin F<sub>Y</sub> (54 kDa) recognizes a yersinia-specific outer membrane protein (YiuR) as a receptor molecule in susceptible bacterial strains. YiuR protein is encoded by many yersiniae (e.g. *Y. pestis*, *Y. pseudotuberculosis*, *Y. enterocolitica*, and *Y. frederiksenii*). YiuR belongs to the family of TonB-dependent proteins with putative iron uptake function. Colicin F<sub>Y</sub> uses the TonB system for translocation, similar to colicins B, D, Ia, and Ib. Lethal activity of colicin F<sub>Y</sub> is exerted by formation of voltage-gated pore in the cytoplasmic membrane. The lethal effect of colicin F<sub>Y</sub> is directed against several nonpathogenic and opportunistic yersiniae (i.e. *Y. frederiksenii*, *Y. aldovae*, *Y. kristensenii*, and *Y. intermedia*) and also against pathogenic strains of *Y. enterocolitica*. Previously published data [33] suggested that *Y. enterocolitica* is widely susceptible to colicin F<sub>Y</sub>; however, the strain collection was limited to only 31 *Y. enterocolitica* isolates originated in the Czech Republic that were not characterized in detail.

In this study, 110 *Y. enterocolitica* isolates with different geographical origins and sources were characterized in detail to exclude any potential clonal character of the isolates. Colicin F<sub>Y</sub> inhibited growth of all tested isolates indicating that the vast majority of *Y. enterocolitica* strains are susceptible to colicin F<sub>Y</sub>.

## Materials and Methods

### Bacterial strains and growth conditions

Colicin F<sub>Y</sub> producer, *Yersinia frederiksenii* strain Y27601, was obtained from the National Reference Laboratory for *Salmonella*, The National Institute of Public Health (NIPH), Prague. The recombinant strain producing colicin F<sub>Y</sub> (*Escherichia coli* TOP10F<sup>+</sup>pDS1068) was constructed in our laboratory [33]. *Y. enterocolitica* isolates were obtained from several institutions including the National Reference Laboratory for *Salmonella*, NIPH, Prague; the Department of Clinical Microbiology, University Hospital Brno (UHB), Brno; and the Max von Pettenkofer-Institut (MvPI), Ludwig Maximilian University of Munich, Munich. Detailed information for the isolates of *Y. enterocolitica* used in this work is presented in Table S1. We used a set of 118 *Escherichia* isolates containing *E. coli* (39 isolates), *E. fergusonii* (10 isolates), *E. hermannii* (42 isolates), and *E. vulneris* (27 isolates). An additional 18 isolates of enterobacterial species included *Budvicia aquatica* (24510; from E. Aldová), *Citrobacter youngae* (42/57; NIPH), *C. braakii* (B718; UHB), *C. freundii* (B607; UHB), *Enterobacter aerogenes* (1832; NIPH), *E. cloacae* (B604; UHB), *Klebsiella pneumoniae* (B615; UHB), *K. oxytoca* (B632; UHB), *Kluyvera ascorbata* (B792; UHB), *Leclercia adecarboxylata* (2666; from I. Sedláček), *Morganella morganii* (B619; UHB), *Pragia fontium* (24613; from E. Aldová), *Proteus vulgaris* (B635; UHB), *Serratia ficaria* (B779; UHB), *Salmonella enterica* subsp. *enterica* (B753; UHB), *Shigella flexneri* (strain 4; [66]), *S. sonnei* (strain 17; from laboratory stock), and *S. boydii* (U1; from V. Horák).

Tryptone-yeast (TY) broth consisting of 8 g/l tryptone (Hi-Media, Mumbai, India), 5 g/l yeast extract (Hi-Media), and 5 g/l sodium chloride in water was used throughout the study. For cultivation on solid media, TY broth was supplemented with agar powder (1.5%, w/v; Hi-Media). Mueller-Hinton agar (38 g/l; Hi-Media) was used for analysis of antibiotic susceptibility. TY agar plates supplemented with L-(+)-arabinose (0.2 g/l; Sigma-Aldrich, St. Louis, USA) were used to induce expression of colicin F<sub>Y</sub> in recombinant *E. coli* TOP10F<sup>+</sup>pDS1068.

### 16S rRNA analysis

To analyze the 16S rDNA in *Y. enterocolitica* isolates, a part of the 16S rRNA gene, consisting of 524 bp, was amplified from a single bacterial colony resuspended in 100 µl of deionized water. The yersinia DNA was amplified using *Taq* polymerase (New England Biolabs, Beverly, USA) and a pair of 16S rDNA-specific primers (16SRNA-F: 5'-AGTTTGATCATGGCTCAG-3' and 16SRNA-R: 5'-TTACCGCGGCTGCTGGCA-3') [34]. Colony PCR started with denaturation at 94°C for 5 min, followed by 40 cycles at 95°C for 30 s, 50°C for 30 s, 72°C for 1 min, and extension at 72°C for 10 min. PCR products were sequenced using *Taq* DyeDeoxy Terminator Cycle Sequencing Kit (Applied Biosystems, Foster City, USA). The Lasergene program package (DNASTAR, Madison, USA) was used for assembly of the sequencing reads and further data analyses. Isolates were classified to subspecies on the basis of polymorphisms in the 30 bp region of the 16S rDNA [35].

### Bioserotype classification

*Y. enterocolitica* isolates were serotyped and bityped using previously described methods [1,2]. Isolates from the Czech Republic were serotyped using diagnostic agglutination antisera O:3, O:5, O:8 and O:9 (ITEST PLUS, Hradec Králové, Czech Republic) and bityped on the basis of esculin hydrolysis, indole production, xylose and/or trehalose utilization. Bioserotypes of 50 isolates from outside the Czech Republic were provided with isolates. For verification of the provided bioserotype characteriza-

tion, a random subgroup (n=15) of these isolates was also bioserotyped.

### Pulsed field gel electrophoresis (PFGE)

Overnight TY cultures were centrifuged, diluted in suspension buffer (100 mM Tris (Sigma-Aldrich), 100 mM EDTA (Sigma-Aldrich), pH=8) to OD<sub>600</sub>=1.4 and mixed with equal volume of 1.6% Pulsed Field Certified Agarose (Bio-Rad Laboratories, Hercules, USA) containing 1% SDS (Sigma-Aldrich). Proteinase K (Sigma-Aldrich) was added to the suspension (to a final concentration of 0.5 mg/ml) and samples were aliquoted into plug molds. Each plug was transferred into 5 ml of lysis buffer (50 mM Tris, 50 mM EDTA, 1% SDS, 500 µg proteinase K, pH=8) and incubated at 54°C for 2 hours. The plugs were then washed in deionized water at 54°C (2×15 min) followed by washing (4×15 min) with TE buffer (10 mM Tris, 1 mM EDTA, pH=8). After bacterial lysis, the plugs were digested with 50 U of *NotI* enzyme (New England Biolabs) at 37°C for 3 hours and were loaded into a 1% Pulsed Field Certified Agarose gel. Electrophoresis was performed using a CHEF-DR II system (Bio-Rad Laboratories) in 0.5% TBE (50 mM Tris, 50 mM boric acid, 1.5 mM EDTA) at 14°C, 6 V/cm and a ramping time of 2.5 s to 25 s over 24 hours. Gels were stained with ethidium bromide (1 µg/ml) and visualized under UV light. Genomic DNA from *Salmonella enterica*, serotype Braenderup H9812, digested using *XbaI* enzyme (New England Biolabs), was used as a molecular weight standard.

BioNumerics v6.1 (Applied Maths, Sint Martens Latem, Belgium) was used to analyze restriction profiles (bands from ~50 kbp to ~500 kbp). Based on the PFGE data, dendrograms were constructed using Dice's coefficient of similarity and Unweighted Pair Group Method with Arithmetic Mean (UP-GMA) clustering at 0.5% tolerance.

### Detection of virulence factors

Genomic DNA was isolated from overnight cultures using DNAzol<sup>®</sup> Reagent (Invitrogen, Carlsbad, USA), according to the manufacturer's instructions. Isolated DNA (1 µl) was used as a template for multiplex PCR [36]. Three different virulence markers – *ystA* (gene encoding yersinia stable toxin, 134 bp), *virF* (gene encoding transcriptional activator of *yop* genes, 231 bp) and *ail* (attachment and invasion locus, 356 bp), were amplified using 0.5 U *Taq* polymerase (New England Biolabs) and specific primer pairs (Yst-a: 5'-GTCTTCATTTGGAGGATTCGGC-3', Yst-b: 5'-AATCACTACTGACTTCGGCTGG-3', VirF-a: 5'-GCTTTTGCTTGCCTTTAGCTCG-3', VirF-b: 5'-AGAA-TACGTCGCTCGCTTATCC-3', Ail-a: 5'-TGGTTATGCG-CAAAGCCATGT-3', and Ail-b: 5'-TGGAAGTGGGTT-GAATTGCA-3').

PCR started with denaturation at 94°C for 5 min, followed by 35 cycles at 94°C for 30 s, 55°C for 30 s, 72°C for 1 min, and extension at 72°C for 10 min. When multiplex PCR results were negative, virulence markers were analyzed separately under the same PCR conditions.

### Antibiotic susceptibility assay

Yersiniae were tested for susceptibility to 14 antibiotics using the disc diffusion method and the National Committee for Clinical Laboratory Standards guidelines [37]. Susceptibility assays with antibiotic disks (Oxoid, Basingstoke, UK) were performed on Mueller-Hinton agar at 37°C. The following antimicrobial drugs and quantities were used: ampicillin (AMP; 10 mg), cephalothin (KF; 30 mg), doxycycline (DO; 30 mg), cefuroxime (CXM; 30 mg), ciprofloxacin (CIP; 5 mg), sulfamethoxazole-trimethoprim

(SXT; 25 mg), oxolinic acid (OA; 30 mg), gentamicin (CN; 10 mg), cefotaxime (CTX; 30 mg), ceftazidime (CAZ; 30 mg), amoxicillin with clavulanic acid (AMC; 30 mg), aztreonam (ATM; 30 mg), chloramphenicol (C; 30 mg), and colistin sulphate (CT; 10 mg).

### Colicin activity assay

Detection of colicin activity was performed as described previously [38]. Briefly, the agar plates were inoculated with a stab from the bacterial culture (*Y. frederiksenii* Y27601, *E. coli* TOP10F<sup>+</sup> carrying pDS1068, and *E. coli* TOP10F<sup>+</sup> carrying pBAD-A), incubated at 37°C for 48 hours and the resulting macrocolonies were killed with chloroform vapors. Each plate was overlaid with a 0.75% TY agar (3 ml) containing  $1 \times 10^8$  cells of a tested isolate. Simultaneously, the level of bacterial susceptibility to colicin F<sub>Y</sub> was detected by spotting of serial dilutions (diluting factor 0.25) of purified colicin F<sub>Y</sub> [33] on the same agar plates. The plates were then incubated at 25°C overnight and zones of growth inhibition were read. The reciprocal value of the highest dilution of the purified colicin causing complete and partial growth inhibition (clear and turbid zone, respectively) of susceptible bacteria was considered to be the colicin titer (in arbitrary units, A.U.).

### Detection of colicin F<sub>Y</sub> immunity gene

To analyze for the presence of the colicin F<sub>Y</sub> immunity gene in *Y. enterocolitica* isolates, a part of the *cfjI* gene, consisting of 162 bp, was amplified from a single bacterial colony resuspended in 100 μl of deionized water. Bacterial suspensions (1 μl) were boiled and used as a DNA templates, which were amplified using *Taq* polymerase (New England Biolabs) and specific primers (immFy-F: 5'-GGACGTTACCGCTACGG-3' and immFy-R: 5'-AC-CCTGAAAGCGAACGAC-3'). Colony PCR started with denaturation at 94°C for 5 min, which was followed by 40 cycles at 95°C for 30 s, 58°C for 30 s, 72°C for 1 min, and finished by extension at 72°C for 10 min.

### Sequencing of *yiur* and *tonB* genes

The *yiur* gene from nine *Y. enterocolitica* isolates (YE48, YE61, YE66, YE73, YE81, YE84, YE85, YE93, and YE97) was amplified from a single colony using *Taq* polymerase (New England Biolabs) and specific primers (YE1461SD-F: 5'-ACCGAAATAAATGGC-TAAGGCCTTTAGG-3', and YE1461-R: 5'-TTAGAAATCG-TAGCTGGCGC-3'). Colony PCR started with denaturation at 94°C for 5 min, followed by 40 cycles at 95°C for 30 s, 58°C for 2 min, 72°C for 1 min, and extension at 72°C for 10 min. Additionally, the *tonB* gene was amplified using specific primers (tonB\_YE2222-F: 5'-ATGCAGCTAAATAAATTTTCTTGGG-3' and tonB\_YE2222-R: 5'-TTAGTCCATTTCCGTCGTG-3'). All PCR products were sequenced using a *Taq* DyeDeoxy Terminator Cycle Sequencing Kit (Applied Biosystems). The Lasergene program package (DNASTAR) was used for assembly of the sequencing reads and further data analyses.

## Results

### Sequencing of 16S rRNA genes, serological and biochemical characterization of isolates

Sequencing analysis of the 16S rRNA coding DNA confirmed that all 110 tested isolates belonged to the *Y. enterocolitica* species (data not shown). Moreover, sequencing results were used to classify isolates into subspecies; 108 isolates were identified as *Y. enterocolitica* subsp. *palaearctica* and 2 isolates as *Y. enterocolitica* subsp. *enterocolitica* (Fig. S1). Seven different serotypes and all six different

biotypes (1A, 1B, 2, 3, 4, and 5) were present within the isolates (Fig. S1). Common human pathogenic serotypes, (i.e. O:3, O:5,27, O:8, and O:9) and also several atypical serotypes (i.e. O:5, O:6,30 and O:36) were present in our collection. *Y. enterocolitica* bioserotype 4/O:3 was the most frequent (77%).

### PFGE analysis

To determine the genetic variability of *Y. enterocolitica* isolates, restriction profiles of all isolates were determined (Fig. S1). Altogether, 41 various pulsotypes (at the 85% similarity level) were identified (Fig. 1). Moreover, 24 different pulsotypes were found within the most abundant bioserotype 4/O:3 subgroup.

### Identification of virulence markers

Two chromosome- and one plasmid-encoded virulence markers (*ail*, *ystA*, and *virF*, respectively) were detected using PCR (Fig. S1). In contrast to the chromosomal genes, which were detected in more than 90% of isolates (91% and 96% for *ail* and *ystA*, respectively), the *virF* gene was found in only 50% of *Y. enterocolitica* isolates. All three determinants were identified in 52 isolates (47%) and only four isolates were negative for all tested markers. Taken together, most of the collected isolates could be considered to be potentially pathogenic *Y. enterocolitica*.

### Susceptibility to antibiotics

All tested yersiniae were susceptible to ciprofloxacin, cefotaxime, ceftazidime, aztreonam, and colistin sulphate. About 20% of isolates showed an intermediate susceptibility to cefuroxime and amoxicillin with clavulanic acid. In addition, more than 90% of isolates were susceptible to doxycycline, sulfamethoxazole-trimethoprim, oxolinic acid, gentamicin, and chloramphenicol. Less than 10% of yersiniae were susceptible to ampicillin and cephalothin. Altogether, 20 different antibiograms were identified (Table S2), with the most frequent antibiogram, A1, identified in 46% of isolates (Fig. S1). Isolates with antibiogram A1 were susceptible to all tested antibiotics with the exception of ampicillin and cephalothin.

### Susceptibility to colicin F<sub>Y</sub>

Colicin F<sub>Y</sub> producers, *Y. frederiksenii* Y27601 and a recombinant strain of *E. coli* carrying pDS1068 [33], inhibited growth of all tested *Y. enterocolitica* isolates. All *Y. enterocolitica* isolates were also susceptible to purified colicin F<sub>Y</sub>. Degree of susceptibility to purified colicin F<sub>Y</sub> (shown as a colicin titer in A.U.) varied from 64 to 1024 and from 256 to 65536 for clear and turbid zones of growth inhibition, respectively. The susceptibility of individual isolates of *Y. enterocolitica* to colicin F<sub>Y</sub> is shown in Fig. S1 and the distribution of colicin F<sub>Y</sub> susceptibility among *Y. enterocolitica* is shown in Fig. 2. The susceptibility of *Y. enterocolitica* isolates to colicin F<sub>Y</sub> showed a nonrandom distribution (chi-squared goodness of fit test;  $p \leq 0.001$ ), where the majority of isolates were susceptible to 4096 A.U. for turbid zones of growth inhibition. Sequence analysis of two proteins (YiuR and TonB) in five highly and four less susceptible isolates identified variability within isolates (26 and 18 amino acid positions, respectively). However, not a single variable position of YiuR or TonB was associated with the difference in susceptibility to colicin F<sub>Y</sub> (Fig. 3). All 110 isolates did not encode a colicin F<sub>Y</sub> immunity protein, which should affect the susceptibility to colicin F<sub>Y</sub>.

In contrast to the universal susceptibility of *Y. enterocolitica* strains to colicin F<sub>Y</sub>, no colicin F<sub>Y</sub>-susceptible strains outside the *Yersinia* genus were identified when 136 isolates belonging to the 13 other enterobacterial genera (i.e. *Budvicia*, *Citrobacter*, *Enterobacter*, *Esche-*

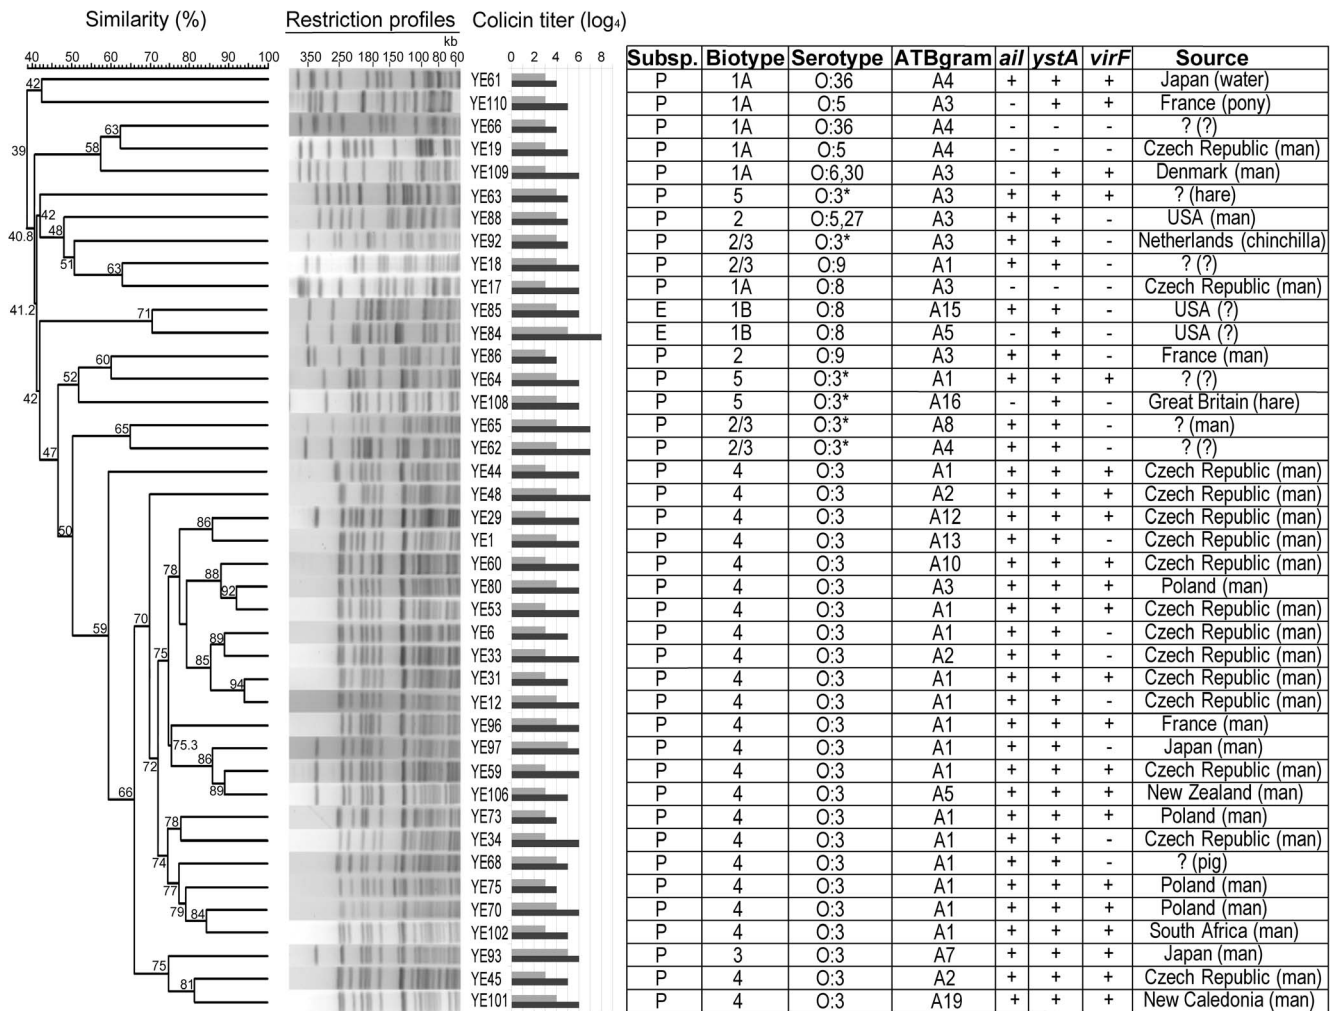

**Figure 1. Identified pulsotypes among *Y. enterocolitica* isolates.** Similarities (%) between restriction patterns were calculated using the Dice's index and are shown as the numbers close to nodes. The data were sorted using the UPGMA method. For construction of this dendrogram, 41 *Y. enterocolitica* pulsotypes with similarity lower than 85% were selected from a dendrogram containing all 110 isolates (Fig. S1). Susceptibility to colicin F<sub>Y</sub> is shown in the right panel, followed by additional strain characteristics. Colicin F<sub>Y</sub> titers are shown as the reciprocal exponent of the highest four-fold dilution causing clear (light grey) and turbid (dark grey) zones of inhibition. Subspecies: P = *palearctica*, E = *enterocolitica*. \*Serotypes O:1 and O:2 have been combined to O:3 serotype according to [1]. doi:10.1371/journal.pone.0081829.g001

*richia*, *Klebsiella*, *Kluyvera*, *Leclercia*, *Morganella*, *Pragia*, *Proteus*, *Salmonella*, *Serratia*, and *Shigella*) were tested (data not shown).

**Discussion**

The aim of this study was to evaluate susceptibility of *Y. enterocolitica* to colicin F<sub>Y</sub> using a set of characterized isolates. The 110 isolates were collected from different geographical areas with the majority of isolates originating in Europe. Most of *Y. enterocolitica* isolates originated from human clinical material, but veterinary and environmental isolates were also present. To exclude the possibility that the collection of *Y. enterocolitica* contains multiple isolates of identical strains, further characterization of these isolates was performed including analysis of the 16S rRNA genes, serotyping, biotyping, restriction profiling of genomic DNA, detection of virulence markers and susceptibility to antibiotics. Using these typing techniques, 77 different *Y. enterocolitica* strains were identified in our collection, from which 59 strains were represented by a single isolate, while the other 18 strains contained more than one isolate with identical characteristics. High genetic

variability was shown for nonhuman isolates, while more subtle variability was found within the 4/O:3 subgroup. Almost all tested isolates can be considered to be pathogenic or potentially pathogenic. With the exception of two beta-lactam antibiotics, isolates of *Y. enterocolitica* were susceptible to all tested antibiotics. As results of the characterization assays are in agreement with other studies on *Y. enterocolitica* [5,9,39–48], our set of *Y. enterocolitica* isolates represents a group of isolates with typical features.

None of the 110 isolates of *Y. enterocolitica* encoded the colicin F<sub>Y</sub> immunity protein (data not shown) and all were susceptible to colicin F<sub>Y</sub>; however they differed in the degree of susceptibility to it. No obvious association between colicin F<sub>Y</sub> susceptibility and other described strain parameters was found, indicating that it is independent of other strains characteristics (Fig. S1). Moreover, no amino acid replacements in the YiuR and TonB proteins were associated with differences in colicin F<sub>Y</sub> susceptibility. Others features (e.g. cell wall composition) seem to affect susceptibility to colicin F<sub>Y</sub>.

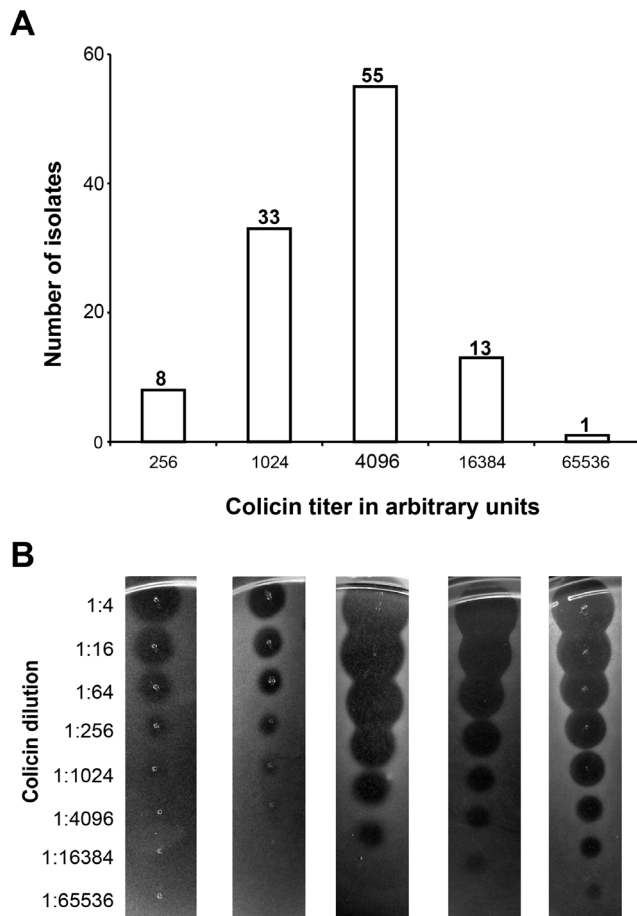

**Figure 2. Susceptibility of *Y. enterocolitica* isolates to colicin F<sub>Y</sub>.** A) Distribution of colicin F<sub>Y</sub> susceptibility levels. Colicin F<sub>Y</sub> susceptibility is shown as colicin titers representing the highest dilution causing detectable growth inhibition (last turbid zone). The susceptibility to colicin F<sub>Y</sub> ranged from 256 to 65536 A.U. Half of the *Y. enterocolitica* isolates showed susceptibility corresponding to titer of 4096 A.U. B) Inhibition zones corresponding to different levels of susceptibility. Isolates YE75, YE24, YE107, YE99, and YE84 were used as representative indicators.

doi:10.1371/journal.pone.0081829.g002

Bacterial resistance to bacteriocins is considered to be a successful strategy in antimicrobial competition [49–51]. It has been shown that around 75% of *E. coli* strains isolated from different source populations are resistant to one or more bacteriocin types [52,53]. Resistance to bacteriocin-like substances produced by yersiniae has been found among *Y. enterocolitica* strains [21]. In addition, enterocolitacin, a characterized phage tail-like bacteriocin, has been shown to inhibit pathogenic *Y. enterocolitica* serotypes O:3, O:5,27, and O:9, but not serotype O:8 and various nonpathogenic isolates (biotype 1A) [31]. In contrast, colicin F<sub>Y</sub> appears to inhibit all *Y. enterocolitica* isolates. A similar finding has been published with respect to an uncharacterized bacteriocin from *Y. kristensenii* and 35 tested strains of *Y. enterocolitica* [24,54,55]; however, it is not known whether this uncharacterized bacteriocin could, in fact, be colicin F<sub>Y</sub>.

Although the reason for the universal susceptibility of *Y. enterocolitica* to colicin F<sub>Y</sub> is unknown, it can be speculated that this could be a result of the clonal character of isolates and/or the

essential character of the YiuR receptor for yersiniae. The clonal character of *Y. enterocolitica* was obvious only in pathogenic isolates (e.g. serotype O:3), while nonpathogenic isolates of biotype 1A were more heterogeneous [56,57]. This explanation therefore appears unlikely. Similarly, the essential character of the YiuR receptor also appears unlikely, since yersiniae possess several iron uptake systems (e.g. *Y. pestis* harbors several systems and Yiu-mediated transport is not first in the iron uptake hierarchy [58]). Another possible explanation for universal activity of colicin F<sub>Y</sub> against *Y. enterocolitica* involves a close relationship between *Y. enterocolitica* and colicin F<sub>Y</sub> producers, with little or no contact between them. A phylogenetic analysis showed that *Y. enterocolitica* was clearly related to other environmental enterocolitica-like species including *Y. frederiksenii* [59,60]. In addition, contact between the two bacterial species appears to be quite rare despite the sporadic co-occurrence of both species [61–63]. The separation of *Y. enterocolitica* strains from environmental colicin F<sub>Y</sub>-producers could explain the absence of colicin F<sub>Y</sub> resistant mutants among *Y. enterocolitica* strains. In fact, colicin F<sub>Y</sub> resistant colonies of *Y. enterocolitica* were induced in the presence of colicin F<sub>Y</sub> in laboratory conditions (data not shown). Moreover, the environmental yersiniae (e.g. *Y. frederiksenii* and *Y. kristensenii*) that live in the same environment as colicin producers contain both resistant and susceptible strains to colicin F<sub>Y</sub> [33].

There is increasing interest in nonpathogenic microorganisms and their antimicrobial substances that naturally antagonize pathogenic agents. To date, several nonpathogenic *Escherichia coli* strains have been used as probiotics (e.g. *E. coli* Nissle 1917; [64]). Although the role of bacteriocin synthesis in probiotic bacteria is not known, production of bacteriocins is a common feature of many of them [65–67]. It is therefore tempting to speculate that synthesis of colicin F<sub>Y</sub> could represent an important feature of recombinant probiotic *E. coli* strains used in cases of diarrhea caused by yersiniae. However, the effect of colicin F<sub>Y</sub> synthesis should be tested using *in vivo* experiments to see whether colicin F<sub>Y</sub> has therapeutic potential relative to intestinal yersiniosis.

## Supporting Information

**Figure S1 Dendrogram of *Y. enterocolitica* isolates.** Similarities (%) between restriction patterns were calculated using the Dice's index and are shown as the numbers close to nodes. The data were sorted using the UPGMA method. Susceptibility to colicin F<sub>Y</sub> is shown in the right panel, followed by additional strain characteristics. Colicin F<sub>Y</sub> titers are shown as the reciprocal exponent of the highest four-fold dilution causing clear (light grey) and turbid (dark grey) zones of inhibition. \*Serotypes O:1 and O:2 have been combined to O:3 serotype according to [1]. The lines on the right side show isolates with the same characteristics (i.e. considered to be identical strains).

(TIF)

**Table S1** *Y. enterocolitica* isolates used in this study. (DOCX)

**Table S2** Antibiotic susceptibility of *Y. enterocolitica* isolates. (DOCX)

## Author Contributions

Conceived and designed the experiments: JB DS. Performed the experiments: JB LM MV DG. Analyzed the data: JB LM DS. Contributed reagents/materials/analysis tools: MV AS DD DG. Wrote the paper: JB DS.

**A**

| Cons. Position | 28 | 174 | 270 | 315 | 358 | 366 | 396 | 403 | 445 | 446 | 455 | 459 | 467 | 492 | 494 | 519 | 520 | 527 | 532 | 556 | 568 | 575 | 577 | 599 | 601 | 630 |   |
|----------------|----|-----|-----|-----|-----|-----|-----|-----|-----|-----|-----|-----|-----|-----|-----|-----|-----|-----|-----|-----|-----|-----|-----|-----|-----|-----|---|
| YE48           | .  | .   | .   | .   | .   | .   | .   | .   | .   | .   | .   | .   | .   | .   | .   | .   | .   | .   | .   | .   | .   | .   | .   | .   | .   | .   | . |
| YE84           | .  | D   | .   | .   | W   | .   | .   | A   | A   | N   | Q   | I   | M   | .   | N   | V   | T   | Y   | N   | Q   | G   | S   | E   | M   | K   | V   |   |
| YE85           | .  | D   | .   | .   | W   | .   | .   | A   | A   | N   | Q   | I   | M   | .   | N   | V   | T   | Y   | N   | Q   | G   | S   | E   | M   | K   | V   |   |
| YE93           | .  | .   | .   | .   | .   | .   | .   | .   | .   | .   | .   | .   | .   | .   | .   | .   | .   | .   | .   | .   | .   | .   | .   | .   | .   | .   | . |
| YE97           | .  | .   | .   | .   | .   | .   | .   | .   | .   | .   | .   | .   | .   | .   | .   | .   | .   | .   | .   | .   | .   | .   | .   | .   | .   | .   | . |
| YE61           | .  | D   | S   | L   | W   | .   | M   | .   | .   | .   | .   | .   | M   | .   | N   | .   | T   | .   | .   | Q   | G   | .   | .   | M   | .   | .   |   |
| YE66           | .  | D   | S   | L   | W   | .   | M   | .   | .   | .   | .   | .   | M   | .   | N   | .   | T   | .   | .   | Q   | G   | .   | .   | M   | .   | .   |   |
| YE73           | A  | .   | .   | .   | .   | N   | .   | .   | .   | .   | .   | .   | .   | .   | A   | .   | .   | .   | .   | .   | .   | .   | .   | .   | .   | .   |   |
| YE81           | A  | .   | .   | .   | .   | .   | .   | .   | .   | .   | .   | .   | .   | .   | A   | .   | .   | .   | .   | .   | .   | .   | .   | .   | .   | .   |   |

**B**

| Cons. Position | 11 | 76 | 78 | 79 | 80 | 81 | 83 | 99 | 111 | 112 | 121 | 122 | 123 | 124 | 125 | 142 | 148 | 162 |   |
|----------------|----|----|----|----|----|----|----|----|-----|-----|-----|-----|-----|-----|-----|-----|-----|-----|---|
| YE48           | W  | .  | .  | .  | E  | P  | .  | .  | .   | .   | .   | .   | .   | .   | .   | .   | .   | .   | . |
| YE84           | .  | .  | .  | .  | .  | E  | S  | K  | P   | .   | .   | .   | .   | .   | .   | .   | A   | L   | . |
| YE85           | .  | Q  | .  | .  | .  | E  | S  | K  | P   | .   | .   | .   | .   | .   | .   | .   | A   | .   | . |
| YE93           | W  | .  | .  | .  | .  | .  | .  | .  | .   | .   | .   | .   | .   | .   | .   | .   | .   | .   | . |
| YE97           | .  | .  | .  | .  | E  | P  | .  | .  | .   | .   | .   | .   | .   | .   | .   | .   | .   | .   | . |
| YE61           | .  | .  | .  | .  | .  | E  | .  | .  | .   | .   | .   | .   | .   | .   | .   | .   | E   | .   | . |
| YE66           | .  | .  | .  | .  | .  | E  | .  | .  | .   | .   | .   | .   | .   | .   | .   | .   | E   | .   | . |
| YE73           | W  | .  | .  | .  | E  | P  | .  | .  | .   | .   | .   | .   | .   | .   | .   | .   | .   | .   | . |
| YE81           | W  | .  | .  | .  | E  | P  | .  | .  | .   | .   | .   | .   | .   | .   | .   | .   | .   | .   | . |

**Figure 3. Sequence variability between highly and less susceptible *Y. enterocolitica* isolates.** A) Sequence analysis of YiuR protein from various isolates identified variability in 26 amino acid positions. B) Sequence analysis of TonB from various isolates identified variability in 18 amino acid positions. A consensus sequence is shown at the top of the figure. The numbers correspond to amino acid position in the YiuR and TonB proteins, respectively. doi:10.1371/journal.pone.0081829.g003

**References**

- Aleksić S, Bockemühl J (1984) Proposed revision of the Wauters et al. antigenic scheme for serotyping of *Yersinia enterocolitica*. J Clin Microbiol 20: 99–102.
- Wauters G, Kandolo K, Janssens M (1987) Revised biogrouping scheme of *Yersinia enterocolitica*. Contrib Microbiol Immunol 9: 14–21.
- Wauters G, Aleksić S, Charlier J, Schulze G (1991) Somatic and flagellar antigens of *Yersinia enterocolitica* and related species. Contrib Microbiol Immunol 12: 239–243.
- Bottone EJ (1997) *Yersinia enterocolitica*: the charisma continues. Clin Microbiol Rev 10: 257–276.
- Bottone EJ (1999) *Yersinia enterocolitica*: overview and epidemiologic correlates. Microbes and Infection 1: 323–333.
- Fredriksson-Ahomaa M, Hallanvuos S, Korte T, Siitonen A, Korkeala H (2001) Correspondence of genotypes of sporadic *Yersinia enterocolitica* bioserotype 4/O:3 strains from human and porcine sources. Epidemiol Infect 127: 37–47.
- Fredriksson-Ahomaa M, Korkeala H (2003) Low occurrence of pathogenic *Yersinia enterocolitica* in clinical, food, and environmental samples: a methodological problem. Clin Microbiol Rev 16: 220–229.
- Wang X, Cui Z, Jin D, Tang L, Xia S, et al. (2009) Distribution of pathogenic *Yersinia enterocolitica* in China. Eur J Clin Microbiol Infect Dis 28: 1237–1244.
- European Food Safety Authority (2012) The European Union summary report on trends and sources of zoonoses, zoonotic agents and food-borne outbreaks in 2010. EFSA J 10: e2597 doi:10.2903/j.efsa.2012.2597.
- Marriott DJ, Taylor S, Dorman DC (1985) *Yersinia enterocolitica* infection in children. Med J Aust 143: 489–492.
- Lee LA, Gerber AR, Lonsway DR, Smith JD, Carter GP, et al. (1990) *Yersinia enterocolitica* O:3 infections in infants and children, associated with the household preparation of chitterlings. N Engl J Med 322: 984–987.
- Lee LA, Taylor J, Carter GP, Quinn B, Farmer JJ, et al. (1991) *Yersinia enterocolitica* O:3: an emerging cause of pediatric gastroenteritis in the United States. J Infect Dis 163: 660–663.
- Gray JT, WaKabongo M, Campos FE, Diallo AA, Tyndal C, et al. (2001) Recognition of *Yersinia enterocolitica* multiple strain infection in twin infants using PCR-based DNA fingerprinting. J Appl Microbiol 90: 358–364.
- Ray SM, Ahuja SD, Blake PA, Farley MM, Samuel M, et al. (2004) Population-based surveillance for *Yersinia enterocolitica* infections in FoodNet Sites, 1996–1999: Higher risk of disease in infants and minority populations. Clin Infect Dis 38(s3): S181–S189. doi: 10.1086/381585.
- Pai CH, Gillis F, Tuomanen E, Marks MI (1984) Placebo-controlled double-blind evaluation of trimethoprim-sulfamethoxazole treatment of *Yersinia enterocolitica* gastroenteritis. J Pediatr 104: 308–311.
- Hoogkamp-Korstanje JA, Stolk-Engelaar VM (1995) *Yersinia enterocolitica* infection in children. Pediatr Infect Dis J 14: 771–775.
- Abdel-Haq NM, Asmar BI, Abuhammour WM, Brown WJ (2000) *Yersinia enterocolitica* infection in children. Pediatr Infect Dis J 19: 954–958.
- Cascales E, Buchanan SK, Duché D, Kleanthous C, Llobès R, et al. (2007) Colicin biology. Microbiol Mol Biol Rev 71: 158–229.
- Ben-Gurion R, Hertman I (1958) Bacteriocin-like material produced by *Pasteurella pestis*. J Gen Microbiol 19: 289–297.
- Bottone EJ, Sandhu KK, Pisano MA (1979) *Yersinia intermedia*: temperature-dependent bacteriocin production. J Clin Microbiol 10: 433–436.
- Calvo C, Brault J, Ramos-Cormenzana A, Mollaret HH (1986) Production of bacteriocin-like substances by *Yersinia frederiksenii*, *Y. kristensenii*, and *Y. intermedia* strains. Folia Microbiol 31: 177–186.
- Cafferkey MT, McClean K, Drumm ME (1989) Production of bacteriocin-like antagonism by clinical isolates of *Yersinia enterocolitica*. J Clin Microbiol 27: 677–680.
- Csiszár K, Tóth I (1992) Bacteriocin-like antagonism in *Yersinia enterocolitica*. Acta Microbiol Hung 39: 193–201.
- Toora S, Budu-Amoako E, Ablett RF, Smith J (1994) Inhibition and inactivation of pathogenic serogroups of *Yersinia enterocolitica* by a bacteriocin produced by *Yersinia kristensenii*. Lett App Microbiol 19: 40–43.
- Ferber DM, Brubaker RR (1979) Mode of action of pesticin: N-acetylglucosaminidase activity. J Bacteriol 139: 495–501.
- Rakin A, Saken E, Harmsen D, Heesemann J (1994) The pesticin receptor of *Yersinia enterocolitica*: a novel virulence factor with dual function. Mol Microbiol 13: 253–263.
- Pils H, Killmann H, Hantke K, Braun V (1996) Periplasmic location of the pesticin immunity protein suggests inactivation of pesticin in the periplasm. J Bacteriol 178: 2431–2435.
- Rakin A, Boogakowa E, Heesemann J (1996) Structural and functional organization of the *Yersinia pestis* bacteriocin pesticin gene cluster. Microbiology 142: 3415–3424.
- Vollmer W, Pils H, Hantke K, Hölte JV, Braun V (1997) Pesticin displays muramidase activity. J Bacteriol 179: 1580–1583.
- Patzer SI, Albrecht R, Braun V, Zeth K (2012) Structural and mechanistic studies of pesticin, a bacterial homolog of phage lysozymes. J Biol Chem 287: 23381–23396.
- Strauch E, Kaspar H, Schaudinn C, Dersch P, Madela K, et al. (2001) Characterization of enterocolitacin, a phage tail-like bacteriocin, and its effect on pathogenic *Yersinia enterocolitica* strains. Appl Environ Microbiol 67: 5634–5642.

32. Damasko C, Konietzny A, Kaspar H, Appel B, Dersch P, et al. (2005) Studies of the efficacy of enterocoliticin, a phage-tail like bacteriocin, as antimicrobial agent against *Yersinia enterocolitica* serotype O3 in a cell culture system and in mice. *J Vet Med B* 52: 171–179.
33. Bošák J, Laiblová P, Šmarda J, Dedicová D, Šmajs D (2012) Novel colicin Fy of *Yersinia frederiksenii* inhibits pathogenic *Yersinia* strains via YiuR-mediated reception, TonB import, and cell membrane pore formation. *J Bacteriol* 194:1950–1959.
34. Kotetishvili M, Kreger A, Wauters G, Morris JG, Sulakvelidze A, et al. (2005) Multilocus sequence typing for studying genetic relationships among *Yersinia* species. *J Clin Microbiol* 43: 2674–2684.
35. Neubauer H, Aleksic S, Hensel A, Finke EJ, Meyer H (2000) *Yersinia enterocolitica* 16S rRNA gene types belong to the same genospecies but form three homology groups. *Int J Med Microbiol* 290: 61–64.
36. Harnett N, Lin YP, Krishnan C (1996) Detection of pathogenic *Yersinia enterocolitica* using the multiplex polymerase chain reaction. *Epidemiol Infect* 117: 59–67.
37. Clinical and Laboratory Standards Institute (2012) Performance standards for antimicrobial disk susceptibility tests; Approved standard - Eleventh edition. Clinical and Laboratory Standards Institute. Wayne PA. 58.
38. Šmarda J, Šmajs D, Horynová S (2006) Incidence of lysogenic, colicinogenic and siderophore-producing strains among human non-pathogenic *Escherichia coli*. *Folia Microbiol* 51: 387–391.
39. Bissett ML, Powers C, Abbott SL, Janda JM (1990) Epidemiologic investigations of *Yersinia enterocolitica* and related species: sources, frequency, and serogroup distribution. *J Clin Microbiol* 28: 910–902.
40. Batzilla J, Antonenka U, Höper D, Heesemann J, Rakin A (2011) *Yersinia enterocolitica paleartica* serobiotyp O:3/4 - a successful group of emerging zoonotic pathogens. *BMC Genomics* 12: e348. doi: 10.1186/1471-2164-12-348.
41. Rahman A, Bonny TS, Stonsaovapak S, Ananchaipattana C (2011) *Yersinia enterocolitica*: Epidemiological studies and outbreaks. *J Pathog* 2011: e239391. doi:10.4061/2011/239391.
42. Saken E, Roggenkamp A, Aleksic S, Heesemann J (1994) Characterisation of pathogenic *Yersinia enterocolitica* serogroups by pulsed-field gel electrophoresis of genomic *NotI* restriction fragments. *J Med Microbiol* 41: 329–338.
43. Najdenski H, Itean I, Carniel E (1994) Efficient subtyping of pathogenic *Yersinia enterocolitica* strains by pulsed-field gel electrophoresis. *J Clin Microbiol* 32: 2913–2920.
44. Itean I, Guiyoule A, Carniel E (1996) Comparison of three molecular methods for typing and subtyping pathogenic *Yersinia enterocolitica* strains. *J Med Microbiol* 45: 48–56.
45. Asplund K, Johansson T, Siitonen A (1998) Evaluation of pulsed-field gel electrophoresis of genomic restriction fragments in the discrimination of *Yersinia enterocolitica* O:3. *Epidemiol Infect* 121: 579–586.
46. Zheng H, Sun Y, Mao Z, Jiang B (2008) Investigation of virulence genes in clinical isolates of *Yersinia enterocolitica*. *FEMS Immunol Med Microbiol* 53: 368–374.
47. Fàbrega A, Vila J (2012) *Yersinia enterocolitica*: pathogenesis, virulence and antimicrobial resistance. *Enferm Infecc Microbiol Clin* 30: 24–32.
48. Stock I, Wiedemann B (1999) An in-vitro study of the antimicrobial susceptibilities of *Yersinia enterocolitica* and the definition of a database. *J Antimicrob Chemother* 43: 37–45.
49. Riley MA, Gordon DM (1999) The ecological role of bacteriocins in bacterial competition. *Trends Microbiol* 7: 129–133.
50. Kerr B, Riley MA, Feldman MW, Bohannan BJM (2002) Local dispersal promotes biodiversity in a real-life game of rock-paper-scissors. *Nature* 418: 171–174.
51. Nahum JR, Harding BN, Kerr B (2011) Evolution of restraint in a structured rock-paper-scissors community. *Proc Natl Acad Sci U S A* 108 (s2):10831–10838. doi: 10.1073/pnas.1100296108.
52. Feldgarden M, Riley MA (1998) High levels of colicin resistance in *Escherichia coli*. *Evolution* 52: 1270–1276.
53. Gordon DM, Riley MA, Pinou T (1998) Temporal changes in the frequency of colicinogeny in *Escherichia coli* from house mice. *Microbiology* 144: 2233–2240.
54. Toora S (1995) Partial purification and characterization of bacteriocin from *Yersinia kristensenii*. *J Appl Bacteriol* 78: 224–228.
55. Toora S (1995) Application of *Yersinia kristensenii* bacteriocin as a specific marker for the rapid identification of suspected isolates of *Yersinia enterocolitica*. *Lett Appl Microbiol* 20: 171–174.
56. Bhaduri S, Wesley I, Richards H, Draughon A, Wallace M (2009) Clonality and antibiotic susceptibility of *Yersinia enterocolitica* isolated from U.S. market weight hogs. *Foodborne Pathog Dis* 6: 351–356.
57. Sihvonen LM, Jalkanen K, Huovinen E, Toivonen S, Corander J, et al. (2012) Clinical isolates of *Yersinia enterocolitica* Biotyp 1A represent two phylogenetic lineages with differing pathogenicity-related properties. *BMC Microbiology* 12: 208. doi: 10.1186/1471-2180-12-208.
58. Kirillina O, Bobrov AG, Fetherston JD, Perry RD (2006) Hierarchy of iron uptake systems: Yfu and Yiu are functional in *Yersinia pestis*. *Infect Immun* 74: 6171–6178.
59. Chen PE, Cook C, Stewart AC, Nagarajan N, Sommer DD, et al. (2010) Genomic characterization of the *Yersinia* genus. *Genome Biol* 11: R1. doi: 10.1186/gb-2010-11-1-r1.
60. Reuter S, Thomson NR, McNally A (2012) Evolutionary dynamics of the *Yersinia enterocolitica* complex. *Adv Exp Med Biol* 954: 15–22. doi: 10.1007/978-1-4614-3561-7\_2.
61. Shayegani M, DeForge I, McGlynn DM, Root T (1981) Characteristics of *Yersinia enterocolitica* and related species isolated from human, animal, and environmental sources. *J Clin Microbiol* 14: 304–312.
62. Greenwood M, Hooper WL (1987) Human carriage of *Yersinia* spp. *J Med Microbiol* 23: 345–348.
63. Soltan-Dallal MM, Moezardalan K (2004) Frequency of *Yersinia* species infection in paediatric acute diarrhoea in Tehran. *East Mediterr Health J* 10: 152–158.
64. Lodinová-Zádníková R, Sonnenborn U (1997) Effect of preventive administration of a nonpathogenic *Escherichia coli* strain on the colonization of the intestine with microbial pathogens in newborn infants. *Biol Neonate* 71: 224–232.
65. Patzer SI, Baquero MR, Bravo D, Moreno F, Hantke K (2003) The colicin G, H and X determinants encode microcins M and H47, which might utilize the catechol siderophore receptors FepA, Cir, Fiu and IroN. *Microbiology* 149: 2557–2570.
66. Cursino L, Šmajs D, Šmarda J, Nardi RM, Nicoli JR, et al. (2006) Exoproducts of the *Escherichia coli* strain H22 inhibiting some enteric pathogens both *in vitro* and *in vivo*. *J Appl Microbiol* 100: 821–829.
67. Wooley RE, Gibbs PS, Shotts EB Jr. (1999) Inhibition of *Salmonella typhimurium* in the chicken intestinal tract by a transformed avirulent avian *Escherichia coli*. *Avian Dis* 43: 245–250.
